# Supplementary material
Source: MDPI journal article supplement (https://www.mdpi.com/2073-4395/11/3/497)
Supplement: s1 [file s1]

**Supplementary:** List of video clips for news content analysis

1. CitizenThaiPBS. Extend The Rice and Fish Exchange to the Survival in the COVID-19 era. 2020. Available online: [https://www.facebook.com/watch/live/?v=258672632193149&ref=watch\\_permalink](https://www.facebook.com/watch/live/?v=258672632193149&ref=watch_permalink) (In Thai)
2. Flex station. FLEX Podcast EP.2 'Sharing Pantries' and Thai basic society with Mr. Supakit Kulchartvijit. 2020. Available online: [https://www.youtube.com/watch?v=qU3eUoAP\\_e0](https://www.youtube.com/watch?v=qU3eUoAP_e0) (In Thai)
3. FM96.5. Talking with Asst. Prof. Dr. Suwichan Phattanaphraiwan about Rice and Fish Exchange between Mountain and Ocean People project for getting through COVID-19 situation. 2020. Available online: [https://www.facebook.com/watch/live/?v=268774757504675&ref=watch\\_permalink](https://www.facebook.com/watch/live/?v=268774757504675&ref=watch_permalink) (In Thai)
4. JSL Global Media. Mr. Bank Supakit Kulchartvijit, online coach specialist in marketing. 2020. Available online: <https://www.youtube.com/watch?v=dNcGJqRgWQA> (In Thai)
5. Kulwattanotai. K. That's great! Dr. Suwichan Phattanaphraiwan Rice and Fish Exchange between Mountain and Ocean People project. 2020. Available online: <https://www.youtube.com/watch?v=Ql4ZWPJEoh0> (In Thai)
6. ThaiPBS. Food Security in the New Normal era: COVID-19 go through together. 2020. Available online: <https://www.youtube.com/watch?v=5ZQoYYkwqVA&t=3s> (In Thai)
7. ThaiPBS. Rawai Fish and Rice Exchange. 2020. Available online: [https://www.youtube.com/watch?v=thL2\\_rn4ivU](https://www.youtube.com/watch?v=thL2_rn4ivU) (In Thai)
8. ThaiPBS. Rice and Fish Exchange Idea: COVID-19 go through together. 2020. Available online: <https://www.youtube.com/watch?v=vkHoCCRH7eA> (In Thai)
9. ThaiPBS. Rice and Fish Exchange Way in the COVID-19 time: COVID-19 go through together. 2020. Available online: <https://www.youtube.com/watch?v=HnxwO4P8iMA> (In Thai)
10. The Reporters. Rice and Fish Exchange project, a supporting community for going through the COVID-19. 2020. Available online: [https://www.facebook.com/watch/live/?v=1206854056312260&ref=watch\\_permalink](https://www.facebook.com/watch/live/?v=1206854056312260&ref=watch_permalink) the reporters (In Thai)
11. The standard. 'Sharing Pantries Sharing Kindness', The standard daily. 2020. Available online: <https://www.youtube.com/watch?v=3GoZHOtsXFE&t=1072s> (In Thai)
